# Supplementary material
Source: HighWire-hosted journal article supplement (doi:10.1101/rna.037473.112)
Supplement: SuppLegends.docx [file SuppLegends.docx]

**SUPPLEMENTAL MATERIAL**

**Supplemental Table 1.** Description of the used transcriptome sequencing datasets.

**Supplemental Table 2.** Reported trait/disease-associated SNPs that could be relocated within Ensembl genes.

**Supplemental Table 3.** Reported trait/disease-associated SNPs that could be relocated within AceView genes.

**Supplemental Dataset 1.** The sequence of AceView transcripts that are within the intergenic and intronic regions of Ensembl annotation.

**Supplemental Dataset 2.** Expression levels of the AceView transcripts that are within the intergenic and intronic regions of Ensembl annotation for 58 RNA-Seq data we used.
